# Supplementary material for: Food Products as Sources of Protein and Amino Acids—The Case of Poland
Source: PubMed Central journal article supplement (PMC6315330; doi:10.3390/nu10121977), 2018-12-13
Supplement: nutrients-10-01977-s001.pdf [file nutrients-10-01977-s001.pdf]

# Food Products as Sources of Protein and Amino Acids - the case of Poland

## Supplementary Section

**Table S1.** Food group sources of protein contribution to the average Polish diet (food categories and groups contributed at least 0.2% of protein)

**Table S2.** Food categories and groups sources of leucine contribution to the average Polish diet (food categories and groups contributed at least 0.2% of leucine)

**Table S3.** Food categories and groups sources of isoleucine contribution to the average Polish diet (food categories and groups contributed at least 0.2% of isoleucine)

**Table S4.** Food categories and groups sources of valine contribution to the average Polish diet (food categories and groups contributed at least 0.2% of valine)

**Table S5.** Food categories and groups sources of lysine contribution to the average Polish diet (food categories and groups contributed at least 0.2% of lysine)

**Table S6.** Food categories and groups sources of histidine contribution to the average Polish diet (food categories and groups contributed at least 0.2% of histidine)

**Table S7.** Food categories and groups sources of threonine contribution to the average Polish diet (food categories and groups contributed at least 0.2% of threonine)

**Table S8.** Food categories and groups sources of tryptophan contribution to the average Polish diet (food categories and groups contributed at least 0.2% of tryptophan)

**Table S9.** Food categories and groups sources of phenylalanine contribution to the average Polish diet (food categories and groups contributed at least 0.2% of phenylalanine)

**Table S10.** Food categories and groups sources of methionine contribution to the average Polish diet (food categories and groups contributed at least 0.2% of methionine)

**Table S11.** Food categories and groups sources of cysteine contribution to the average Polish diet (food categories and groups contributed at least 0.2% of cysteine)

**Table S12.** Food categories and groups sources of tyrosine contribution to the average Polish diet (food categories and groups contributed at least 0.2% of tyrosine)

**Table S13.** Food categories and groups sources of arginine contribution to the average Polish diet (food categories and groups contributed at least 0.2% of arginine)

**Table S14.** Food categories and groups sources of glycine contribution to the average Polish diet (food categories and groups contributed at least 0.2% of glycine)

**Table S15.** Food categories and groups sources of proline contribution to the average Polish diet (food categories and groups contributed at least 0.2% of proline)

**Table S16.** Food categories and groups sources of aspartic acid contribution to the average Polish diet (food categories and groups contributed at least 0.2% of aspartic acid)

**Table S17.** Food categories and groups sources of glutamic acid contribution to the average Polish diet (food categories and groups contributed at least 0.2% of glutamic acid)

**Table S18.** Food categories and groups sources of serine contribution to the average Polish diet (food categories and groups contributed at least 0.2% of serine)

**Table S19.** Food categories and groups sources of alanine contribution to the average Polish diet (food categories and groups contributed at least 0.2% of alanine)

**Table S1.** Food group sources of protein contribution to the average Polish diet

| <b>Food Group</b>                                | <b>Rank</b> | <b>% of Protein<sup>1/</sup><br/>Contribution</b> | <b>Cumulative % of<br/>Protein Contribution</b> |
|--------------------------------------------------|-------------|---------------------------------------------------|-------------------------------------------------|
| meat products                                    | 1           | 17.44                                             | 17.44                                           |
| bread, rolls, bread products                     | 2           | 16.49                                             | 33.93                                           |
| red meat                                         | 3           | 9.91                                              | 43.84                                           |
| poultry                                          | 4           | 9.71                                              | 53.55                                           |
| cheese                                           | 5           | 5.64                                              | 59.19                                           |
| milk                                             | 6           | 5.43                                              | 64.62                                           |
| vegetables (excluding potatoes)                  | 7           | 5.28                                              | 69.91                                           |
| yoghurts and milk drinks                         | 8           | 3.65                                              | 73.56                                           |
| eggs                                             | 9           | 3.53                                              | 77.10                                           |
| cottage cheese                                   | 10          | 3.34                                              | 80.43                                           |
| flour, bran, cooking ingredients                 | 11          | 3.10                                              | 83.53                                           |
| potatoes                                         | 12          | 2.65                                              | 86.18                                           |
| pizza, pasta, macaroni and other flour<br>dishes | 13          | 2.47                                              | 88.66                                           |
| other meat                                       | 14          | 1.89                                              | 90.55                                           |
| processed seafood                                | 15          | 1.56                                              | 92.10                                           |
| rice, cooked grains                              | 16          | 1.09                                              | 93.20                                           |
| fishes                                           | 17          | 0.99                                              | 94.18                                           |
| fruits                                           | 18          | 0.93                                              | 95.11                                           |
| chocolate                                        | 19          | 0.83                                              | 95.94                                           |
| sweet bakery products                            | 20          | 0.78                                              | 96.72                                           |
| ready-to-eat cereal                              | 21          | 0.77                                              | 97.50                                           |
| desserts                                         | 22          | 0.53                                              | 98.03                                           |
| sour cream                                       | 23          | 0.43                                              | 98.46                                           |
| dried fruits an nuts                             | 24          | 0.39                                              | 98.84                                           |
| beer                                             | 25          | 0.32                                              | 99.17                                           |
| juices                                           | 26          | 0.24                                              | 99.40                                           |
| snacks                                           | 27          | 0.21                                              | 99.61                                           |

<sup>1/</sup> food categories and groups contributed at least 0.2% of protein

**Table S2.** Food categories and groups sources of leucine contribution to the average Polish diet

| <b>Food Categories<br/>Food Groups</b>           | <b>Rank</b> | <b>% of Leucine<sup>1/</sup><br/>Contribution</b> | <b>Cumulative % of Leucine<br/>Contribution</b> |
|--------------------------------------------------|-------------|---------------------------------------------------|-------------------------------------------------|
| <b>Food Categories</b>                           |             |                                                   |                                                 |
| meat and meat products                           | 1           | 39.85                                             | 39.85                                           |
| grain products                                   | 2           | 22.10                                             | 61.95                                           |
| milk and dairy products                          | 3           | 20.02                                             | 81.97                                           |
| vegetables                                       | 4           | 6.99                                              | 88.96                                           |
| eggs                                             | 5           | 3.89                                              | 92.85                                           |
| seafood                                          | 6           | 2.63                                              | 95.48                                           |
| snacks and sweets                                | 7           | 2.45                                              | 97.93                                           |
| fruits                                           | 8           | 1.01                                              | 98.94                                           |
| fats and oils                                    | 9           | 0.66                                              | 99.60                                           |
| beverages, nonalcoholic                          | 10          | 0.24                                              | 99.84                                           |
| <b>Food Groups</b>                               |             |                                                   |                                                 |
| meat products                                    | 1           | 18.39                                             | 18.39                                           |
| bread, rolls, bread products                     | 2           | 14.91                                             | 33.30                                           |
| red meat                                         | 3           | 10.47                                             | 43.76                                           |
| poultry                                          | 4           | 9.03                                              | 52.79                                           |
| milk                                             | 5           | 6.15                                              | 58.95                                           |
| cheese                                           | 6           | 5.96                                              | 64.91                                           |
| vegetables (excluding potatoes)                  | 7           | 4.84                                              | 69.75                                           |
| yoghurts and milk drinks                         | 8           | 4.24                                              | 73.98                                           |
| eggs                                             | 9           | 3.89                                              | 77.87                                           |
| cottage cheese                                   | 10          | 3.67                                              | 81.54                                           |
| flour, bran, cooking ingredients                 | 11          | 2.74                                              | 84.28                                           |
| pizza, pasta, macaroni and other flour<br>dishes | 12          | 2.53                                              | 86.81                                           |
| potatoes                                         | 13          | 2.16                                              | 88.97                                           |
| other meat                                       | 14          | 1.96                                              | 90.93                                           |
| processed seafood                                | 15          | 1.56                                              | 92.49                                           |
| rice, cooked grains                              | 16          | 1.09                                              | 93.58                                           |
| fishes                                           | 17          | 1.04                                              | 94.62                                           |
| chocolate                                        | 18          | 0.86                                              | 95.47                                           |
| ready-to-eat cereal                              | 19          | 0.83                                              | 96.31                                           |
| sweet bakery products                            | 20          | 0.79                                              | 97.10                                           |
| fruits                                           | 21          | 0.70                                              | 97.80                                           |
| desserts                                         | 22          | 0.59                                              | 98.39                                           |
| sour cream                                       | 23          | 0.49                                              | 98.88                                           |
| dried fruits and nuts                            | 24          | 0.31                                              | 99.19                                           |
| snacks                                           | 25          | 0.21                                              | 99.41                                           |

<sup>1/</sup> food categories and groups contributed at least 0.2% of leucine

**Table S3.** Food categories and groups sources of isoleucine contribution to the average Polish diet

| <b>Food Categories<br/>Food Groups</b>        | <b>Rank</b> | <b>% of Isoleucine<sup>1/</sup><br/>Contribution</b> | <b>Cumulative % of<br/>Isoleucine Contribution</b> |
|-----------------------------------------------|-------------|------------------------------------------------------|----------------------------------------------------|
| <b>Food Categories</b>                        |             |                                                      |                                                    |
| meat and meat products                        | 1           | 41.32                                                | 41.32                                              |
| grain products                                | 2           | 21.31                                                | 62.63                                              |
| milk and dairy products                       | 3           | 19.05                                                | 81.68                                              |
| vegetables                                    | 4           | 6.86                                                 | 88.54                                              |
| eggs                                          | 5           | 4.28                                                 | 92.82                                              |
| seafood                                       | 6           | 2.68                                                 | 95.50                                              |
| snacks and sweets                             | 7           | 2.29                                                 | 97.78                                              |
| Fruits                                        | 8           | 1.01                                                 | 98.79                                              |
| fats and oils                                 | 9           | 0.70                                                 | 99.49                                              |
| nonalcoholic beverages                        | 10          | 0.31                                                 | 99.79                                              |
| alcoholic beverages                           | 11          | 0.20                                                 | 99.99                                              |
| <b>Food Groups</b>                            |             |                                                      |                                                    |
| meat products                                 | 1           | 19.18                                                | 19.18                                              |
| bread, rolls, bread products                  | 2           | 14.82                                                | 34.00                                              |
| red meat                                      | 3           | 10.29                                                | 44.28                                              |
| poultry                                       | 4           | 10.06                                                | 54.34                                              |
| milk                                          | 5           | 6.28                                                 | 60.63                                              |
| cheese                                        | 6           | 5.35                                                 | 65.98                                              |
| vegetables (excluding potatoes)               | 7           | 4.53                                                 | 70.51                                              |
| eggs                                          | 8           | 4.28                                                 | 74.78                                              |
| yoghurts and milk drinks                      | 9           | 4.03                                                 | 78.81                                              |
| cottage cheese                                | 10          | 3.39                                                 | 82.20                                              |
| pizza, pasta, macaroni and other flour dishes | 11          | 2.43                                                 | 84.63                                              |
| flour, bran, cooking ingredients              | 12          | 2.37                                                 | 87.00                                              |
| potatoes                                      | 13          | 2.33                                                 | 89.33                                              |
| other meat                                    | 14          | 1.80                                                 | 91.13                                              |
| processed seafood                             | 15          | 1.61                                                 | 92.74                                              |
| rice, cooked grains                           | 16          | 1.05                                                 | 93.79                                              |
| fishes                                        | 17          | 1.04                                                 | 94.84                                              |
| chocolate                                     | 18          | 0.78                                                 | 95.62                                              |
| sweet bakery products                         | 19          | 0.77                                                 | 96.38                                              |
| fruits                                        | 20          | 0.70                                                 | 97.08                                              |
| ready-to-eat cereal                           | 21          | 0.64                                                 | 97.72                                              |
| desserts                                      | 22          | 0.55                                                 | 98.27                                              |
| sour cream                                    | 23          | 0.46                                                 | 98.73                                              |
| dried fruits and nuts                         | 24          | 0.31                                                 | 99.04                                              |
| beer                                          | 25          | 0.20                                                 | 99.24                                              |

<sup>1/</sup> food categories and groups contributed at least 0.2% of isoleucine

**Table S4.** Food categories and groups sources of valine contribution to the average Polish diet

| <b>Food Categories<br/>Food Groups</b>           | <b>Rank</b> | <b>% of Valine<sup>1/</sup><br/>Contribution</b> | <b>Cumulative % of<br/>Valine Contribution</b> |
|--------------------------------------------------|-------------|--------------------------------------------------|------------------------------------------------|
| <b>Food Categories</b>                           |             |                                                  |                                                |
| meat and meat products                           | 1           | 37.36                                            | 37.36                                          |
| grain products                                   | 2           | 22.08                                            | 59.44                                          |
| milk and dairy products                          | 3           | 20.84                                            | 80.28                                          |
| vegetables                                       | 4           | 7.76                                             | 88.05                                          |
| eggs                                             | 5           | 4.32                                             | 92.37                                          |
| seafood                                          | 6           | 2.72                                             | 95.08                                          |
| snacks and sweets                                | 7           | 2.50                                             | 97.58                                          |
| fruits                                           | 8           | 1.10                                             | 98.69                                          |
| fats and oils                                    | 9           | 0.69                                             | 99.38                                          |
| nonalcoholic beverages                           | 10          | 0.32                                             | 99.70                                          |
| alcoholic beverages                              | 11          | 0.30                                             | 99.99                                          |
| <b>Food Groups</b>                               |             |                                                  |                                                |
| meat products                                    | 1           | 16.62                                            | 16.62                                          |
| bread, rolls, bread products                     | 2           | 15.30                                            | 31.92                                          |
| poultry                                          | 3           | 9.47                                             | 41.39                                          |
| red meat                                         | 4           | 9.45                                             | 50.84                                          |
| milk                                             | 5           | 6.52                                             | 57.36                                          |
| cheese                                           | 6           | 6.29                                             | 63.65                                          |
| vegetables (excluding potatoes)                  | 7           | 4.58                                             | 68.23                                          |
| eggs                                             | 8           | 4.32                                             | 72.55                                          |
| yoghurts and milk drinks                         | 9           | 4.25                                             | 76.79                                          |
| cottage cheese                                   | 10          | 3.79                                             | 80.58                                          |
| potatoes                                         | 11          | 3.18                                             | 83.77                                          |
| flour, bran, cooking ingredients                 | 12          | 2.48                                             | 86.25                                          |
| pizza, pasta, macaroni and other flour<br>dishes | 13          | 2.44                                             | 88.69                                          |
| other meat                                       | 14          | 1.82                                             | 90.51                                          |
| processed seafood                                | 15          | 1.67                                             | 92.18                                          |
| rice, cooked grains                              | 16          | 1.14                                             | 93.32                                          |
| fishes                                           | 17          | 1.02                                             | 94.34                                          |
| chocolate                                        | 18          | 0.91                                             | 95.26                                          |
| fruits                                           | 19          | 0.77                                             | 96.03                                          |
| sweet bakery products                            | 20          | 0.76                                             | 96.79                                          |
| ready-to-eat cereal                              | 21          | 0.72                                             | 97.51                                          |
| desserts                                         | 22          | 0.62                                             | 98.13                                          |
| sour cream                                       | 23          | 0.52                                             | 98.65                                          |
| dried fruits and nuts                            | 24          | 0.33                                             | 98.98                                          |
| beer                                             | 25          | 0.30                                             | 99.27                                          |
| snacks                                           | 26          | 0.21                                             | 99.48                                          |

<sup>1/</sup> food categories and groups contributed at least 0.2% of valine

**Table S5.** Food categories and groups sources of lysine contribution to the average Polish diet

| <b>Food Categories<br/>Food Groups</b>           | <b>Rank</b> | <b>% of Lysine<sup>1/</sup><br/>Contribution</b> | <b>Cumulative % of<br/>Lysine Contribution</b> |
|--------------------------------------------------|-------------|--------------------------------------------------|------------------------------------------------|
| <b>Food Categories</b>                           |             |                                                  |                                                |
| meat and meat products                           | 1           | 49.19                                            | 49.19                                          |
| milk and dairy products                          | 2           | 21.47                                            | 70.66                                          |
| grain products                                   | 3           | 10.96                                            | 81.62                                          |
| vegetables                                       | 4           | 7.53                                             | 89.15                                          |
| eggs                                             | 5           | 3.32                                             | 92.47                                          |
| seafood                                          | 6           | 3.19                                             | 95.67                                          |
| snacks and sweets                                | 7           | 2.14                                             | 97.80                                          |
| fruits                                           | 8           | 0.97                                             | 98.77                                          |
| fats and oils                                    | 9           | 0.71                                             | 99.48                                          |
| nonalcoholic beverages                           | 10          | 0.33                                             | 99.81                                          |
| <b>Food Groups</b>                               |             |                                                  |                                                |
| meat products                                    | 1           | 22.30                                            | 22.30                                          |
| poultry                                          | 2           | 12.41                                            | 34.72                                          |
| red meat                                         | 3           | 12.30                                            | 47.01                                          |
| bread, rolls, bread products                     | 4           | 7.47                                             | 54.49                                          |
| milk                                             | 5           | 7.42                                             | 61.91                                          |
| cheese                                           | 6           | 6.44                                             | 68.35                                          |
| vegetables (excluding potatoes)                  | 7           | 4.96                                             | 73.31                                          |
| yoghurts and milk drinks                         | 8           | 4.28                                             | 77.59                                          |
| cottage cheese                                   | 9           | 3.33                                             | 80.91                                          |
| eggs                                             | 10          | 3.32                                             | 84.24                                          |
| potatoes                                         | 11          | 2.57                                             | 86.81                                          |
| other meat                                       | 12          | 2.17                                             | 88.98                                          |
| processed seafood                                | 13          | 1.89                                             | 90.87                                          |
| pizza, pasta, macaroni and other flour<br>dishes | 14          | 1.44                                             | 92.31                                          |
| fishes                                           | 15          | 1.28                                             | 93.59                                          |
| flour, bran, cooking ingredients                 | 16          | 1.13                                             | 94.72                                          |
| chocolate                                        | 17          | 0.80                                             | 95.52                                          |
| fruits                                           | 18          | 0.75                                             | 96.27                                          |
| desserts                                         | 19          | 0.62                                             | 96.89                                          |
| rice, cooked grains                              | 20          | 0.61                                             | 97.50                                          |
| sour cream                                       | 21          | 0.53                                             | 98.03                                          |
| sweet bakery products                            | 22          | 0.52                                             | 98.55                                          |
| ready-to-eat cereal                              | 23          | 0.30                                             | 98.85                                          |
| dried fruits and nuts                            | 24          | 0.22                                             | 99.07                                          |
| juices                                           | 25          | 0.21                                             | 99.28                                          |
| snacks                                           | 26          | 0.20                                             | 99.48                                          |

<sup>1/</sup> food categories and groups contributed at least 0.2% of lysine

**Table S6.** Food categories and groups sources of histidine contribution to the average Polish diet

| <b>Food Categories</b>                        | <b>Rank</b> | <b>% of Histidine<sup>1/</sup></b> | <b>Cumulative % of</b>        |
|-----------------------------------------------|-------------|------------------------------------|-------------------------------|
| <b>Food Groups</b>                            |             | <b>Contribution</b>                | <b>Histidine Contribution</b> |
| <b>Food Categories</b>                        |             |                                    |                               |
| meat and meat products                        | 1           | 46.57                              | 46.57                         |
| grain products                                | 2           | 19.22                              | 65.79                         |
| milk and dairy products                       | 3           | 17.02                              | 82.81                         |
| vegetables                                    | 4           | 6.50                               | 89.31                         |
| seafood                                       | 5           | 3.22                               | 92.53                         |
| eggs                                          | 6           | 2.81                               | 95.34                         |
| snacks and sweets                             | 7           | 1.91                               | 97.26                         |
| fruits                                        | 8           | 1.53                               | 98.79                         |
| fats and oils                                 | 9           | 0.50                               | 99.29                         |
| nonalcoholic beverages                        | 10          | 0.39                               | 99.68                         |
| alcoholic beverages                           | 11          | 0.31                               | 99.99                         |
| <b>Food Groups</b>                            |             |                                    |                               |
| meat products                                 | 1           | 21.24                              | 21.24                         |
| bread, rolls, bread products                  | 2           | 13.06                              | 34.30                         |
| red meat                                      | 3           | 11.83                              | 46.13                         |
| poultry                                       | 4           | 11.59                              | 57.71                         |
| cheese                                        | 5           | 5.76                               | 63.48                         |
| milk                                          | 6           | 5.02                               | 68.50                         |
| vegetables (excluding potatoes)               | 7           | 4.70                               | 73.20                         |
| yoghurts and milk drinks                      | 8           | 3.23                               | 76.43                         |
| cottage cheese                                | 9           | 3.00                               | 79.43                         |
| eggs                                          | 10          | 2.81                               | 82.24                         |
| flour, bran, cooking ingredients              | 11          | 2.49                               | 84.73                         |
| processed seafood                             | 12          | 2.33                               | 87.06                         |
| pizza, pasta, macaroni and other flour dishes | 13          | 2.19                               | 89.25                         |
| other meat                                    | 14          | 1.91                               | 91.17                         |
| potatoes                                      | 15          | 1.81                               | 92.97                         |
| fruits                                        | 16          | 1.22                               | 94.19                         |
| rice, cooked grains                           | 17          | 0.89                               | 95.08                         |
| fishes                                        | 18          | 0.89                               | 95.97                         |
| chocolate                                     | 19          | 0.68                               | 96.65                         |
| sweet bakery products                         | 20          | 0.63                               | 97.28                         |
| ready-to-eat cereal                           | 21          | 0.58                               | 97.87                         |
| desserts                                      | 22          | 0.46                               | 98.33                         |
| sour cream                                    | 23          | 0.37                               | 98.70                         |
| dried fruits and nuts                         | 24          | 0.31                               | 99.02                         |
| beer                                          | 25          | 0.31                               | 99.33                         |
| juices                                        | 26          | 0.20                               | 99.53                         |

<sup>1/</sup> food categories and groups contributed at least 0.2% of histidine

**Table S7.** Food categories and groups sources of threonine contribution to the average Polish diet

| <b>Food Categories<br/>Food Groups</b>        | <b>Rank</b> | <b>% of Threonine<sup>1/</sup><br/>Contribution</b> | <b>Cumulative % of<br/>Threonine Contribution</b> |
|-----------------------------------------------|-------------|-----------------------------------------------------|---------------------------------------------------|
| <b>Food Categories</b>                        |             |                                                     |                                                   |
| meat and meat products                        | 1           | 44.70                                               | 44.70                                             |
| grain products                                | 2           | 18.48                                               | 63.18                                             |
| milk and dairy products                       | 3           | 17.55                                               | 80.73                                             |
| vegetables                                    | 4           | 7.81                                                | 88.54                                             |
| eggs                                          | 5           | 4.02                                                | 92.56                                             |
| seafood                                       | 6           | 2.77                                                | 95.33                                             |
| snacks and sweets                             | 7           | 2.35                                                | 97.68                                             |
| fruits                                        | 8           | 1.14                                                | 98.83                                             |
| fats and oils                                 | 9           | 0.58                                                | 99.41                                             |
| nonalcoholic beverages                        | 10          | 0.34                                                | 99.74                                             |
| alcoholic beverages                           | 11          | 0.25                                                | 99.99                                             |
| <b>Food Groups</b>                            |             |                                                     |                                                   |
| meat products                                 | 1           | 20.57                                               | 20.57                                             |
| bread, rolls, bread products                  | 2           | 12.74                                               | 33.31                                             |
| red meat                                      | 3           | 12.29                                               | 45.61                                             |
| poultry                                       | 4           | 9.82                                                | 55.43                                             |
| vegetables (excluding potatoes)               | 5           | 5.33                                                | 60.76                                             |
| milk                                          | 6           | 5.19                                                | 65.95                                             |
| cheese                                        | 7           | 4.94                                                | 70.89                                             |
| eggs                                          | 8           | 4.02                                                | 74.91                                             |
| yoghurts and milk drinks                      | 9           | 3.81                                                | 78.72                                             |
| cottage cheese                                | 10          | 3.62                                                | 82.34                                             |
| potatoes                                      | 11          | 2.47                                                | 84.81                                             |
| flour, bran, cooking ingredients              | 12          | 2.13                                                | 86.94                                             |
| other meat                                    | 13          | 2.01                                                | 88.96                                             |
| pizza, pasta, macaroni and other flour dishes | 14          | 2.01                                                | 90.97                                             |
| processed seafood                             | 15          | 1.63                                                | 92.60                                             |
| fishes                                        | 16          | 1.11                                                | 93.71                                             |
| rice, cooked grains                           | 17          | 0.96                                                | 94.68                                             |
| chocolate                                     | 18          | 0.86                                                | 95.54                                             |
| fruits                                        | 19          | 0.84                                                | 96.37                                             |
| sweet bakery products                         | 20          | 0.72                                                | 97.10                                             |
| ready-to-eat cereal                           | 21          | 0.63                                                | 97.73                                             |
| desserts                                      | 22          | 0.54                                                | 98.27                                             |
| sour cream                                    | 23          | 0.43                                                | 98.70                                             |
| dried fruits and nuts                         | 24          | 0.31                                                | 99.00                                             |
| beer                                          | 25          | 0.25                                                | 99.25                                             |
| snacks                                        | 26          | 0.22                                                | 99.48                                             |

<sup>1/</sup> food categories and groups contributed at least 0.2% of threonine



**Table S8.** Food categories and groups sources of tryptophan contribution to the average Polish diet

| <b>Food Categories<br/>Food Groups</b>        | <b>Rank</b> | <b>% of Tryptophan<sup>1/</sup><br/>Contribution</b> | <b>Cumulative % of<br/>Tryptophan Contribution</b> |
|-----------------------------------------------|-------------|------------------------------------------------------|----------------------------------------------------|
| <b>Food Categories</b>                        |             |                                                      |                                                    |
| meat and meat products                        | 1           | 41.39                                                | 41.39                                              |
| grain products                                | 2           | 19.20                                                | 60.58                                              |
| milk and dairy products                       | 3           | 18.87                                                | 79.46                                              |
| vegetables                                    | 4           | 9.05                                                 | 88.50                                              |
| eggs                                          | 5           | 4.19                                                 | 92.69                                              |
| seafood                                       | 6           | 2.42                                                 | 95.11                                              |
| snacks and sweets                             | 7           | 2.31                                                 | 97.43                                              |
| fruits                                        | 8           | 1.17                                                 | 98.60                                              |
| fats and oils                                 | 9           | 0.60                                                 | 99.20                                              |
| alcoholic beverages                           | 10          | 0.51                                                 | 99.70                                              |
| nonalcoholic beverages                        | 11          | 0.29                                                 | 99.99                                              |
| <b>Food Groups</b>                            |             |                                                      |                                                    |
| meat products                                 | 1           | 18.35                                                | 18.35                                              |
| bread, rolls, bread products                  | 2           | 12.91                                                | 31.27                                              |
| red meat                                      | 3           | 10.63                                                | 41.90                                              |
| poultry                                       | 4           | 10.55                                                | 52.45                                              |
| cheese                                        | 5           | 6.24                                                 | 58.68                                              |
| vegetables (excluding potatoes)               | 6           | 5.40                                                 | 64.08                                              |
| milk                                          | 7           | 5.37                                                 | 69.45                                              |
| eggs                                          | 8           | 4.19                                                 | 73.64                                              |
| yoghurts and milk drinks                      | 9           | 3.69                                                 | 77.33                                              |
| potatoes                                      | 10          | 3.65                                                 | 80.98                                              |
| cottage cheese                                | 11          | 3.58                                                 | 84.56                                              |
| pizza, pasta, macaroni and other flour dishes | 12          | 2.34                                                 | 86.89                                              |
| flour, bran, cooking ingredients              | 13          | 2.07                                                 | 88.97                                              |
| other meat                                    | 14          | 1.85                                                 | 90.82                                              |
| processed seafood                             | 15          | 1.48                                                 | 92.29                                              |
| rice, cooked grains                           | 16          | 1.19                                                 | 93.48                                              |
| fishes                                        | 17          | 0.92                                                 | 94.40                                              |
| chocolate                                     | 18          | 0.81                                                 | 95.22                                              |
| fruits                                        | 19          | 0.80                                                 | 96.02                                              |
| sweet bakery products                         | 20          | 0.77                                                 | 96.79                                              |
| ready-to-eat cereal                           | 21          | 0.69                                                 | 97.47                                              |
| desserts                                      | 22          | 0.54                                                 | 98.01                                              |
| beer                                          | 23          | 0.51                                                 | 98.51                                              |
| sour cream                                    | 24          | 0.44                                                 | 98.96                                              |
| dried fruits and nuts                         | 25          | 0.37                                                 | 99.33                                              |
| snacks                                        | 26          | 0.20                                                 | 99.53                                              |

<sup>1/</sup> food categories and groups contributed at least 0.2% of tryptophan

**Table S9.** Food categories and groups sources of phenylalanine contribution to the average Polish diet

| <b>Food Categories<br/>Food Groups</b>           | <b>Rank</b> | <b>% of Phenylalanine<sup>1/</sup><br/>Contribution</b> | <b>Cumulative % of<br/>Phenylalanine Contribution</b> |
|--------------------------------------------------|-------------|---------------------------------------------------------|-------------------------------------------------------|
| <b>Food Categories</b>                           |             |                                                         |                                                       |
| meat and meat products                           | 1           | 35.30                                                   | 35.30                                                 |
| grain products                                   | 2           | 26.26                                                   | 61.56                                                 |
| milk and dairy products                          | 3           | 19.21                                                   | 80.77                                                 |
| vegetables                                       | 4           | 7.88                                                    | 88.65                                                 |
| eggs                                             | 5           | 4.39                                                    | 93.04                                                 |
| snacks and sweets                                | 6           | 2.50                                                    | 95.55                                                 |
| seafood                                          | 7           | 2.23                                                    | 97.77                                                 |
| fruits                                           | 8           | 1.11                                                    | 98.88                                                 |
| fats and oils                                    | 9           | 0.59                                                    | 99.47                                                 |
| nonalcoholic beverages                           | 10          | 0.30                                                    | 99.77                                                 |
| alcoholic beverages                              | 11          | 0.22                                                    | 99.99                                                 |
| <b>Food Groups</b>                               |             |                                                         |                                                       |
| bread, rolls, bread products                     | 1           | 18.04                                                   | 18.04                                                 |
| meat products                                    | 2           | 16.40                                                   | 34.44                                                 |
| red meat                                         | 3           | 9.19                                                    | 43.62                                                 |
| poultry                                          | 4           | 7.86                                                    | 51.49                                                 |
| cheese                                           | 5           | 6.23                                                    | 57.71                                                 |
| milk                                             | 6           | 5.66                                                    | 63.37                                                 |
| vegetables (excluding potatoes)                  | 7           | 5.20                                                    | 68.57                                                 |
| eggs                                             | 8           | 4.39                                                    | 72.96                                                 |
| yoghurts and milk drinks                         | 9           | 3.89                                                    | 76.85                                                 |
| cottage cheese                                   | 10          | 3.43                                                    | 80.29                                                 |
| flour, bran, cooking ingredients                 | 11          | 3.38                                                    | 83.67                                                 |
| pizza, pasta, macaroni and other<br>flour dishes | 12          | 2.93                                                    | 86.60                                                 |
| potatoes                                         | 13          | 2.68                                                    | 89.28                                                 |
| other meat                                       | 14          | 1.85                                                    | 91.13                                                 |
| processed seafood                                | 15          | 1.35                                                    | 92.48                                                 |
| rice, cooked grains                              | 16          | 1.15                                                    | 93.64                                                 |
| chocolate                                        | 17          | 0.88                                                    | 94.51                                                 |
| sweet bakery products                            | 18          | 0.86                                                    | 95.37                                                 |
| fishes                                           | 19          | 0.86                                                    | 96.23                                                 |
| fruits                                           | 20          | 0.76                                                    | 96.98                                                 |
| ready-to-eat cereal                              | 21          | 0.75                                                    | 97.74                                                 |
| desserts                                         | 22          | 0.55                                                    | 98.29                                                 |
| sour cream                                       | 23          | 0.44                                                    | 98.73                                                 |
| dried fruits and nuts                            | 24          | 0.35                                                    | 99.08                                                 |
| snacks                                           | 25          | 0.22                                                    | 99.30                                                 |
| beer                                             | 26          | 0.22                                                    | 99.52                                                 |

<sup>1/</sup> food categories and groups contributed at least 0.2% of phenylalanine

**Table S10.** Food categories and groups sources of methionine contribution to the average Polish diet

| <b>Food Categories<br/>Food Groups</b>           | <b>Rank</b> | <b>% of Methionine<sup>1/</sup><br/>Contribution</b> | <b>Cumulative % of<br/>Methionine Contribution</b> |
|--------------------------------------------------|-------------|------------------------------------------------------|----------------------------------------------------|
| <b>Food Categories</b>                           |             |                                                      |                                                    |
| meat and meat products                           | 1           | 44.24                                                | 44.24                                              |
| grain products                                   | 2           | 20.01                                                | 64.25                                              |
| milk and dairy products                          | 3           | 18.36                                                | 82.61                                              |
| vegetables                                       | 4           | 5.07                                                 | 87.68                                              |
| eggs                                             | 5           | 4.93                                                 | 92.62                                              |
| seafood                                          | 6           | 3.21                                                 | 95.83                                              |
| snacks and sweets                                | 7           | 2.16                                                 | 97.99                                              |
| fruits                                           | 8           | 0.88                                                 | 98.87                                              |
| fats and oils                                    | 9           | 0.59                                                 | 99.46                                              |
| nonalcoholic beverages                           | 10          | 0.40                                                 | 99.86                                              |
| <b>Food Groups</b>                               |             |                                                      |                                                    |
| meat products                                    | 1           | 19.93                                                | 19.93                                              |
| bread, rolls, bread products                     | 2           | 13.69                                                | 33.63                                              |
| poultry                                          | 3           | 11.37                                                | 44.99                                              |
| red meat                                         | 4           | 11.13                                                | 56.13                                              |
| cheese                                           | 5           | 5.60                                                 | 61.73                                              |
| milk                                             | 6           | 5.58                                                 | 67.31                                              |
| eggs                                             | 7           | 4.93                                                 | 72.24                                              |
| yoghurts and milk drinks                         | 8           | 3.76                                                 | 76.01                                              |
| cottage cheese                                   | 9           | 3.42                                                 | 79.42                                              |
| vegetables (excluding potatoes)                  | 10          | 3.27                                                 | 82.69                                              |
| flour, bran, cooking ingredients                 | 11          | 2.42                                                 | 85.11                                              |
| pizza, pasta, macaroni and other flour<br>dishes | 12          | 2.15                                                 | 87.26                                              |
| processed seafood                                | 13          | 1.97                                                 | 89.23                                              |
| other meat                                       | 14          | 1.81                                                 | 91.04                                              |
| potatoes                                         | 15          | 1.80                                                 | 92.84                                              |
| fishes                                           | 16          | 1.22                                                 | 94.06                                              |
| rice, cooked grains                              | 17          | 1.11                                                 | 95.16                                              |
| sweet bakery products                            | 18          | 0.77                                                 | 95.94                                              |
| chocolate                                        | 19          | 0.71                                                 | 96.64                                              |
| fruits                                           | 20          | 0.65                                                 | 97.29                                              |
| ready-to-eat cereal                              | 21          | 0.64                                                 | 97.93                                              |
| desserts                                         | 22          | 0.54                                                 | 98.46                                              |
| sour cream                                       | 23          | 0.44                                                 | 98.90                                              |
| dried fruits and nuts                            | 24          | 0.23                                                 | 99.14                                              |
| other nonalcoholic beverages                     | 25          | 0.23                                                 | 99.37                                              |

<sup>1/</sup> food categories and groups contributed at least 0.2% of methionine

**Table S11.** Food categories and groups sources of cysteine contribution to the average Polish diet

| <b>Food Categories<br/>Food Groups</b>           | <b>Rank</b> | <b>% of Cysteine<sup>1/</sup><br/>Contribution</b> | <b>Cumulative % of Cysteine<br/>Contribution</b> |
|--------------------------------------------------|-------------|----------------------------------------------------|--------------------------------------------------|
| <b>Food Categories</b>                           |             |                                                    |                                                  |
| grain products                                   | 1           | 41.74                                              | 41.74                                            |
| meat and meat products                           | 2           | 31.39                                              | 73.13                                            |
| milk and dairy products                          | 3           | 8.50                                               | 81.63                                            |
| vegetables                                       | 4           | 6.36                                               | 87.99                                            |
| eggs                                             | 5           | 5.10                                               | 93.09                                            |
| snacks and sweets                                | 6           | 2.38                                               | 95.47                                            |
| seafood                                          | 7           | 1.81                                               | 97.27                                            |
| fruits                                           | 8           | 1.22                                               | 98.49                                            |
| alcoholic beverages                              | 9           | 0.80                                               | 99.29                                            |
| nonalcoholic beverages                           | 10          | 0.36                                               | 99.65                                            |
| <b>Food Groups</b>                               |             |                                                    |                                                  |
| bread, rolls, bread products                     | 1           | 29.02                                              | 29.02                                            |
| meat products                                    | 2           | 14.58                                              | 43.60                                            |
| red meat                                         | 3           | 8.11                                               | 51.71                                            |
| poultry                                          | 4           | 7.11                                               | 58.82                                            |
| flour, bran, cooking ingredients                 | 5           | 6.34                                               | 65.15                                            |
| eggs                                             | 6           | 5.10                                               | 70.25                                            |
| vegetables (excluding potatoes)                  | 7           | 4.67                                               | 74.92                                            |
| pizza, pasta, macaroni and other<br>flour dishes | 8           | 3.46                                               | 78.38                                            |
| milk                                             | 9           | 2.81                                               | 81.19                                            |
| cheese                                           | 10          | 2.14                                               | 83.33                                            |
| yoghurts and milk drinks                         | 11          | 2.12                                               | 85.44                                            |
| potatoes                                         | 12          | 1.69                                               | 87.13                                            |
| rice, cooked grains                              | 13          | 1.63                                               | 88.77                                            |
| other meat                                       | 14          | 1.59                                               | 90.36                                            |
| cottage cheese                                   | 15          | 1.44                                               | 91.80                                            |
| ready-to-eat cereal                              | 16          | 1.29                                               | 93.09                                            |
| processed seafood                                | 17          | 1.04                                               | 94.13                                            |
| sweet bakery products                            | 18          | 0.96                                               | 95.09                                            |
| fruits                                           | 19          | 0.87                                               | 95.96                                            |
| beer                                             | 20          | 0.80                                               | 96.76                                            |
| chocolate                                        | 21          | 0.78                                               | 97.54                                            |
| fishes                                           | 22          | 0.76                                               | 98.31                                            |
| desserts                                         | 23          | 0.37                                               | 98.67                                            |
| dried fruits and nuts                            | 24          | 0.35                                               | 99.02                                            |
| snacks                                           | 25          | 0.26                                               | 99.29                                            |
| sour cream                                       | 26          | 0.26                                               | 99.54                                            |
| juices                                           | 27          | 0.20                                               | 99.74                                            |

<sup>1/</sup> food categories and groups contributed at least 0.2% of cysteine

**Table S12.** Food categories and groups sources of tyrosine contribution to the average Polish diet

| <b>Food Categories<br/>Food Groups</b>           | <b>Rank</b> | <b>% of Tyrosine<sup>1/</sup><br/>Contribution</b> | <b>Cumulative % of Tyrosine<br/>Contribution</b> |
|--------------------------------------------------|-------------|----------------------------------------------------|--------------------------------------------------|
| <b>Food Categories</b>                           |             |                                                    |                                                  |
| meat and meat products                           | 1           | 38.30                                              | 38.30                                            |
| milk and dairy products                          | 2           | 23.61                                              | 61.91                                            |
| grain products                                   | 3           | 20.58                                              | 82.50                                            |
| vegetables                                       | 4           | 6.25                                               | 88.75                                            |
| eggs                                             | 5           | 4.04                                               | 92.79                                            |
| snacks and sweets                                | 6           | 2.66                                               | 95.44                                            |
| seafood                                          | 7           | 2.47                                               | 97.92                                            |
| fruits                                           | 8           | 0.91                                               | 98.83                                            |
| fats and oils                                    | 9           | 0.71                                               | 99.54                                            |
| nonalcoholic beverages                           | 10          | 0.28                                               | 99.81                                            |
| <b>Food Groups</b>                               |             |                                                    |                                                  |
| meat products                                    | 1           | 17.73                                              | 17.73                                            |
| bread, rolls, bread products                     | 2           | 14.48                                              | 32.21                                            |
| red meat                                         | 3           | 10.01                                              | 42.22                                            |
| poultry                                          | 4           | 8.81                                               | 51.03                                            |
| cheese                                           | 5           | 8.33                                               | 59.35                                            |
| milk                                             | 6           | 6.16                                               | 65.51                                            |
| cottage cheese                                   | 7           | 4.64                                               | 70.15                                            |
| vegetables (excluding potatoes)                  | 8           | 4.51                                               | 74.67                                            |
| yoghurts and milk drinks                         | 9           | 4.49                                               | 79.15                                            |
| eggs                                             | 10          | 4.04                                               | 83.20                                            |
| pizza, pasta, macaroni and other<br>flour dishes | 11          | 2.22                                               | 85.41                                            |
| flour, bran, cooking ingredients                 | 12          | 1.98                                               | 87.39                                            |
| other meat                                       | 13          | 1.75                                               | 89.15                                            |
| potatoes                                         | 14          | 1.73                                               | 90.88                                            |
| processed seafood                                | 15          | 1.51                                               | 92.39                                            |
| rice, cooked grains                              | 16          | 1.17                                               | 93.56                                            |
| chocolate                                        | 17          | 1.03                                               | 94.59                                            |
| fishes                                           | 18          | 0.96                                               | 95.55                                            |
| ready-to-eat cereal                              | 19          | 0.73                                               | 96.28                                            |
| sweet bakery products                            | 20          | 0.72                                               | 97.00                                            |
| desserts                                         | 21          | 0.66                                               | 97.65                                            |
| fruits                                           | 22          | 0.62                                               | 98.27                                            |
| sour cream                                       | 23          | 0.53                                               | 98.80                                            |
| dried fruits and nuts                            | 24          | 0.30                                               | 99.10                                            |
| snacks                                           | 25          | 0.26                                               | 99.36                                            |

<sup>1/</sup> food categories and groups contributed at least 0.2% of tyrosine

**Table S13.** Food categories and groups sources of arginine contribution to the average Polish diet

| <b>Food Categories<br/>Food Groups</b> | <b>Rank</b> | <b>% of Arginine<sup>1/</sup><br/>Contribution</b> | <b>Cumulative % of Arginine<br/>Contribution</b> |
|----------------------------------------|-------------|----------------------------------------------------|--------------------------------------------------|
| <b>Food Categories</b>                 |             |                                                    |                                                  |
| meat and meat products                 | 1           | 46.12                                              | 46.12                                            |
| grain products                         | 2           | 20.99                                              | 67.11                                            |
| milk and dairy products                | 3           | 11.34                                              | 78.45                                            |
| vegetables                             | 4           | 9.63                                               | 88.08                                            |
| eggs                                   | 5           | 4.06                                               | 92.14                                            |
| seafood                                | 6           | 2.82                                               | 94.96                                            |
| snacks and sweets                      | 7           | 2.38                                               | 97.35                                            |
| fruits                                 | 8           | 1.60                                               | 98.94                                            |
| nonalcoholic beverages                 | 9           | 0.47                                               | 99.41                                            |
| fats and oils                          | 10          | 0.35                                               | 99.76                                            |
| alcoholic beverages                    | 11          | 0.23                                               | 99.99                                            |
| <b>Food Groups</b>                     |             |                                                    |                                                  |
| meat products                          | 1           | 20.88                                              | 20.88                                            |
| bread, rolls, bread products           | 2           | 14.32                                              | 35.20                                            |
| red meat                               | 3           | 12.12                                              | 47.31                                            |
| poultry                                | 4           | 10.85                                              | 58.16                                            |
| vegetables (excluding potatoes)        | 5           | 7.22                                               | 65.38                                            |
| eggs                                   | 6           | 4.06                                               | 69.44                                            |
| cheese                                 | 7           | 3.51                                               | 72.95                                            |
| milk                                   | 8           | 3.40                                               | 76.35                                            |
| flour, bran, cooking ingredients       | 9           | 2.43                                               | 78.78                                            |
| potatoes                               | 10          | 2.41                                               | 81.19                                            |
| yoghurts and milk drinks               | 11          | 2.36                                               | 83.55                                            |
| other meat                             | 12          | 2.28                                               | 85.83                                            |
| cottage cheese                         | 13          | 2.07                                               | 87.90                                            |
| pizza, pasta, macaroni and other       | 14          | 1.92                                               | 89.82                                            |
| flour dishes                           | 15          | 1.75                                               | 91.57                                            |
| processed seafood                      | 16          | 1.55                                               | 93.12                                            |
| rice, cooked grains                    | 17          | 1.07                                               | 94.19                                            |
| fishes                                 | 18          | 0.91                                               | 95.10                                            |
| sweet bakery products                  | 19          | 0.90                                               | 96.01                                            |
| fruits                                 | 20          | 0.89                                               | 96.90                                            |
| chocolate                              | 21          | 0.77                                               | 97.67                                            |
| ready-to-eat cereal                    | 22          | 0.69                                               | 98.36                                            |
| dried fruits and nuts                  | 23          | 0.37                                               | 98.73                                            |
| desserts                               | 24          | 0.29                                               | 99.02                                            |
| juices                                 | 25          | 0.25                                               | 99.27                                            |
| sour cream                             | 26          | 0.23                                               | 99.50                                            |
| beer                                   | 27          | 0.21                                               | 99.71                                            |
| snacks                                 |             |                                                    |                                                  |

<sup>1/</sup> food categories and groups contributed at least 0.2% of arginine

**Table S14.** Food categories and groups sources of glycine contribution to the average Polish diet

| <b>Food Categories<br/>Food Groups</b>           | <b>Rank</b> | <b>% of Glycine<sup>1/</sup><br/>Contribution</b> | <b>Cumulative % of Glycine<br/>Contribution</b> |
|--------------------------------------------------|-------------|---------------------------------------------------|-------------------------------------------------|
| <b>Food Categories</b>                           |             |                                                   |                                                 |
| meat and meat products                           | 1           | 52.46                                             | 52.46                                           |
| grain products                                   | 2           | 21.05                                             | 73.52                                           |
| milk and dairy products                          | 3           | 7.84                                              | 81.36                                           |
| vegetables                                       | 4           | 7.52                                              | 88.88                                           |
| seafood                                          | 5           | 3.36                                              | 92.24                                           |
| eggs                                             | 6           | 2.86                                              | 95.10                                           |
| snacks and sweets                                | 7           | 1.96                                              | 97.06                                           |
| fruits                                           | 8           | 1.61                                              | 98.67                                           |
| beverages, nonalcoholic                          | 9           | 0.58                                              | 99.25                                           |
| alcoholic beverages                              | 10          | 0.45                                              | 99.70                                           |
| fats and oils                                    | 11          | 0.29                                              | 99.99                                           |
| <b>Food Groups</b>                               |             |                                                   |                                                 |
| meat products                                    | 1           | 21.03                                             | 21.03                                           |
| poultry                                          | 2           | 15.39                                             | 36.42                                           |
| bread, rolls, bread products                     | 3           | 14.38                                             | 50.80                                           |
| red meat                                         | 4           | 12.84                                             | 63.65                                           |
| vegetables (excluding potatoes)                  | 5           | 5.44                                              | 69.08                                           |
| other meat                                       | 6           | 3.20                                              | 72.28                                           |
| eggs                                             | 7           | 2.86                                              | 75.15                                           |
| flour, bran, cooking ingredients                 | 8           | 2.62                                              | 77.77                                           |
| cheese                                           | 9           | 2.41                                              | 80.18                                           |
| milk                                             | 10          | 2.27                                              | 82.45                                           |
| potatoes                                         | 11          | 2.08                                              | 84.53                                           |
| pizza, pasta, macaroni and other<br>flour dishes | 12          | 2.07                                              | 86.60                                           |
| processed seafood                                | 13          | 2.03                                              | 88.63                                           |
| yoghurts and milk drinks                         | 14          | 1.70                                              | 90.33                                           |
| cottage cheese                                   | 15          | 1.46                                              | 91.79                                           |
| fishes                                           | 16          | 1.32                                              | 93.12                                           |
| rice, cooked grains                              | 17          | 1.20                                              | 94.31                                           |
| fruits                                           | 18          | 1.15                                              | 95.46                                           |
| ready-to-eat cereal                              | 19          | 0.78                                              | 96.24                                           |
| sweet bakery products                            | 20          | 0.74                                              | 96.98                                           |
| chocolate                                        | 21          | 0.71                                              | 97.69                                           |
| dried fruits and nuts                            | 22          | 0.46                                              | 98.15                                           |
| beer                                             | 23          | 0.45                                              | 98.61                                           |
| juices                                           | 24          | 0.42                                              | 99.02                                           |
| desserts                                         | 25          | 0.28                                              | 99.30                                           |
| snacks                                           | 26          | 0.23                                              | 99.53                                           |

<sup>1/</sup> food categories and groups contributed at least 0.2% of glycine

**Table S15.** Food categories and groups sources of proline contribution to the average Polish diet

| <b>Food Categories<br/>Food Groups</b>           | <b>Rank</b> | <b>% of Proline<sup>1/</sup><br/>Contribution</b> | <b>Cumulative % of Proline<br/>Contribution</b> |
|--------------------------------------------------|-------------|---------------------------------------------------|-------------------------------------------------|
| <b>Food Categories</b>                           |             |                                                   |                                                 |
| grain products                                   | 1           | 34.11                                             | 34.11                                           |
| meat and meat products                           | 2           | 26.65                                             | 60.76                                           |
| milk and dairy products                          | 3           | 24.80                                             | 85.56                                           |
| vegetables                                       | 4           | 5.43                                              | 90.99                                           |
| snacks and sweets                                | 5           | 2.45                                              | 93.44                                           |
| eggs                                             | 6           | 1.97                                              | 95.41                                           |
| seafood                                          | 7           | 1.79                                              | 97.19                                           |
| fruits                                           | 8           | 0.88                                              | 98.07                                           |
| alcoholic beverages                              | 9           | 0.84                                              | 98.91                                           |
| fats and oils                                    | 10          | 0.78                                              | 99.69                                           |
| nonalcoholic beverages                           | 11          | 0.30                                              | 99.99                                           |
| <b>Food Groups</b>                               |             |                                                   |                                                 |
| bread, rolls, bread products                     | 1           | 23.49                                             | 23.49                                           |
| meat products                                    | 2           | 11.13                                             | 34.63                                           |
| cheese                                           | 3           | 8.18                                              | 42.81                                           |
| poultry                                          | 4           | 7.27                                              | 50.08                                           |
| milk                                             | 5           | 7.23                                              | 57.31                                           |
| red meat                                         | 6           | 6.58                                              | 63.89                                           |
| flour, bran, cooking ingredients                 | 7           | 5.04                                              | 68.94                                           |
| yoghurts and milk drinks                         | 8           | 4.74                                              | 73.67                                           |
| cottage cheese                                   | 9           | 4.65                                              | 78.32                                           |
| pizza, pasta, macaroni and other<br>flour dishes | 10          | 3.88                                              | 82.20                                           |
| vegetables (excluding potatoes)                  | 11          | 3.80                                              | 86.00                                           |
| eggs                                             | 12          | 1.97                                              | 87.97                                           |
| other meat                                       | 13          | 1.67                                              | 89.64                                           |
| potatoes                                         | 14          | 1.63                                              | 91.27                                           |
| processed seafood                                | 15          | 1.14                                              | 92.41                                           |
| rice, cooked grains                              | 16          | 0.95                                              | 93.36                                           |
| beer                                             | 17          | 0.84                                              | 94.20                                           |
| chocolate                                        | 18          | 0.84                                              | 95.03                                           |
| sweet bakery products                            | 19          | 0.82                                              | 95.85                                           |
| ready-to-eat cereal                              | 20          | 0.74                                              | 96.59                                           |
| desserts                                         | 21          | 0.68                                              | 97.27                                           |
| fishes                                           | 22          | 0.64                                              | 97.91                                           |
| fruits                                           | 23          | 0.62                                              | 98.53                                           |
| sour cream                                       | 24          | 0.58                                              | 99.11                                           |
| dried fruits and nuts                            | 25          | 0.26                                              | 99.37                                           |

<sup>1/</sup> food categories and groups contributed at least 0.2% of proline



**Table S16.** Food categories and groups sources of aspartic acid contribution to the average Polish diet

| <b>Food Categories<br/>Food Groups</b>           | <b>Rank</b> | <b>% of Aspartic Acid<sup>1/</sup><br/>Contribution</b> | <b>Cumulative % of Aspartic<br/>Acid Contribution</b> |
|--------------------------------------------------|-------------|---------------------------------------------------------|-------------------------------------------------------|
| <b>Food Categories</b>                           |             |                                                         |                                                       |
| meat and meat products                           | 1           | 41.69                                                   | 41.69                                                 |
| grain products                                   | 2           | 16.68                                                   | 58.37                                                 |
| milk and dairy products                          | 3           | 14.29                                                   | 72.66                                                 |
| vegetables                                       | 4           | 13.85                                                   | 86.51                                                 |
| eggs                                             | 5           | 3.47                                                    | 89.98                                                 |
| fruits                                           | 6           | 2.97                                                    | 92.95                                                 |
| seafood                                          | 7           | 2.80                                                    | 95.74                                                 |
| snacks and sweets                                | 8           | 2.33                                                    | 98.08                                                 |
| nonalcoholic beverages                           | 9           | 1.13                                                    | 99.21                                                 |
| fats and oils                                    | 10          | 0.48                                                    | 99.69                                                 |
| alcoholic beverages                              | 11          | 0.28                                                    | 99.96                                                 |
| <b>Food Groups</b>                               |             |                                                         |                                                       |
| meat products                                    | 1           | 18.52                                                   | 18.52                                                 |
| bread, rolls, bread products                     | 2           | 11.38                                                   | 29.90                                                 |
| poultry                                          | 3           | 10.72                                                   | 40.62                                                 |
| red meat                                         | 4           | 10.45                                                   | 51.07                                                 |
| vegetables (excluding potatoes)                  | 5           | 7.12                                                    | 58.19                                                 |
| potatoes                                         | 6           | 6.73                                                    | 64.92                                                 |
| milk                                             | 7           | 4.49                                                    | 69.41                                                 |
| cheese                                           | 8           | 4.18                                                    | 73.59                                                 |
| eggs                                             | 9           | 3.47                                                    | 77.06                                                 |
| yoghurts and milk drinks                         | 10          | 3.05                                                    | 80.11                                                 |
| cottage cheese                                   | 11          | 2.57                                                    | 82.68                                                 |
| fruits                                           | 12          | 2.40                                                    | 85.08                                                 |
| other meat                                       | 13          | 2.00                                                    | 87.08                                                 |
| pizza, pasta, macaroni and other<br>flour dishes | 14          | 2.00                                                    | 89.08                                                 |
| processed seafood                                | 15          | 1.67                                                    | 90.75                                                 |
| flour, bran, cooking ingredients                 | 16          | 1.58                                                    | 92.33                                                 |
| fishes                                           | 17          | 1.12                                                    | 93.45                                                 |
| rice, cooked grains                              | 18          | 1.04                                                    | 94.50                                                 |
| chocolate                                        | 19          | 0.85                                                    | 95.35                                                 |
| ready-to-eat cereal                              | 20          | 0.67                                                    | 96.02                                                 |
| other nonalcoholic beverages                     | 21          | 0.63                                                    | 96.66                                                 |
| sweet bakery products                            | 22          | 0.63                                                    | 97.28                                                 |
| dried fruits and nuts                            | 23          | 0.57                                                    | 97.85                                                 |
| juices                                           | 24          | 0.50                                                    | 98.35                                                 |
| desserts                                         | 25          | 0.45                                                    | 98.80                                                 |
| snacks                                           | 26          | 0.40                                                    | 99.20                                                 |
| sour cream                                       | 27          | 0.35                                                    | 99.56                                                 |
| beer                                             | 28          | 0.27                                                    | 99.83                                                 |

<sup>1/</sup> food categories and groups contributed at least 0.2% of aspartic acid

**Table S17.** Food categories and groups sources of glutamic acid contribution to the average Polish diet

| <b>Food Categories<br/>Food Groups</b>           | <b>Rank</b> | <b>% of Glutamic Acid<sup>1/</sup><br/>Contribution</b> | <b>Cumulative % of Glutamic<br/>Acid Contribution</b> |
|--------------------------------------------------|-------------|---------------------------------------------------------|-------------------------------------------------------|
| <b>Food Categories</b>                           |             |                                                         |                                                       |
| grain products                                   | 1           | 33.82                                                   | 33.82                                                 |
| meat and meat products                           | 2           | 30.90                                                   | 64.72                                                 |
| milk and dairy products                          | 3           | 18.95                                                   | 83.67                                                 |
| vegetables                                       | 4           | 7.26                                                    | 90.93                                                 |
| eggs                                             | 5           | 2.40                                                    | 93.33                                                 |
| snacks and sweets                                | 6           | 2.38                                                    | 95.71                                                 |
| seafood                                          | 7           | 1.96                                                    | 97.67                                                 |
| fruits                                           | 8           | 1.01                                                    | 98.68                                                 |
| fats and oils                                    | 9           | 0.60                                                    | 99.28                                                 |
| nonalcoholic beverages                           | 10          | 0.38                                                    | 99.66                                                 |
| alcoholic beverages                              | 11          | 0.33                                                    | 99.99                                                 |
| <b>Food Groups</b>                               |             |                                                         |                                                       |
| bread, rolls, bread products                     | 1           | 23.16                                                   | 23.16                                                 |
| meat products                                    | 2           | 13.97                                                   | 37.13                                                 |
| red meat                                         | 3           | 7.78                                                    | 44.91                                                 |
| poultry                                          | 4           | 7.75                                                    | 52.66                                                 |
| cheese                                           | 5           | 6.20                                                    | 58.85                                                 |
| milk                                             | 6           | 5.31                                                    | 64.16                                                 |
| vegetables (excluding potatoes)                  | 7           | 5.15                                                    | 69.31                                                 |
| flour, bran, cooking ingredients                 | 8           | 4.99                                                    | 74.30                                                 |
| yoghurts and milk drinks                         | 9           | 3.76                                                    | 78.07                                                 |
| pizza, pasta, macaroni and other<br>flour dishes | 10          | 3.75                                                    | 81.82                                                 |
| cottage cheese                                   | 11          | 3.68                                                    | 85.50                                                 |
| eggs                                             | 12          | 2.40                                                    | 87.89                                                 |
| potatoes                                         | 13          | 2.11                                                    | 90.00                                                 |
| other meat                                       | 14          | 1.41                                                    | 91.41                                                 |
| processed seafood                                | 15          | 1.21                                                    | 92.61                                                 |
| rice, cooked grains                              | 16          | 1.12                                                    | 93.73                                                 |
| sweet bakery products                            | 17          | 0.86                                                    | 94.59                                                 |
| chocolate                                        | 18          | 0.81                                                    | 95.40                                                 |
| ready-to-eat cereal                              | 19          | 0.81                                                    | 96.21                                                 |
| fishes                                           | 20          | 0.74                                                    | 96.95                                                 |
| fruits                                           | 21          | 0.68                                                    | 97.63                                                 |
| desserts                                         | 22          | 0.55                                                    | 98.18                                                 |
| sour cream                                       | 23          | 0.45                                                    | 98.63                                                 |
| dried fruits and nuts                            | 24          | 0.33                                                    | 98.97                                                 |
| beer                                             | 25          | 0.33                                                    | 99.30                                                 |
| juices                                           | 26          | 0.22                                                    | 99.52                                                 |

<sup>1/</sup> food categories and groups contributed at least 0.2% of glutamic acid

**Table S18.** Food categories and groups sources of serine contribution to the average Polish diet

| <b>Food Categories<br/>Food Groups</b> | <b>Rank</b> | <b>% of Serine<sup>1/</sup><br/>Contribution</b> | <b>Cumulative % of Serine<br/>Contribution</b> |
|----------------------------------------|-------------|--------------------------------------------------|------------------------------------------------|
| <b>Food Categories</b>                 |             |                                                  |                                                |
| meat and meat products                 | 1           | 33.63                                            | 33.63                                          |
| grain products                         | 2           | 24.04                                            | 57.67                                          |
| milk and dairy products                | 3           | 21.07                                            | 78.73                                          |
| vegetables                             | 4           | 7.69                                             | 86.42                                          |
| eggs                                   | 5           | 5.62                                             | 92.04                                          |
| snacks and sweets                      | 6           | 2.67                                             | 94.71                                          |
| seafood                                | 7           | 2.61                                             | 97.32                                          |
| fruits                                 | 8           | 1.30                                             | 98.62                                          |
| fats and oils                          | 9           | 0.67                                             | 99.29                                          |
| nonalcoholic beverages                 | 10          | 0.43                                             | 99.72                                          |
| alcoholic beverages                    | 11          | 0.27                                             | 99.99                                          |
| <b>Food Groups</b>                     |             |                                                  |                                                |
| bread, rolls, bread products           | 1           | 16.93                                            | 16.93                                          |
| meat products                          | 2           | 15.09                                            | 32.02                                          |
| red meat                               | 3           | 8.36                                             | 40.38                                          |
| poultry                                | 4           | 8.30                                             | 48.68                                          |
| cheese                                 | 5           | 6.50                                             | 55.18                                          |
| milk                                   | 6           | 6.35                                             | 61.53                                          |
| eggs                                   | 7           | 5.62                                             | 67.14                                          |
| vegetables (excluding potatoes)        | 8           | 5.36                                             | 72.51                                          |
| cottage cheese                         | 9           | 4.16                                             | 76.67                                          |
| yoghurts and milk drinks               | 10          | 4.07                                             | 80.73                                          |
| flour, bran, cooking ingredients       | 11          | 3.09                                             | 83.83                                          |
| potatoes                               | 12          | 2.33                                             | 86.15                                          |
| pizza, pasta, macaroni and other       | 13          | 2.11                                             | 88.27                                          |
| flour dishes                           | 14          | 1.88                                             | 90.14                                          |
| other meat                             | 15          | 1.59                                             | 91.73                                          |
| processed seafood                      | 16          | 1.59                                             | 93.32                                          |
| rice, cooked grains                    | 17          | 1.18                                             | 94.50                                          |
| fishes                                 | 18          | 1.01                                             | 95.51                                          |
| chocolate                              | 19          | 1.00                                             | 96.51                                          |
| fruits                                 | 20          | 0.95                                             | 97.46                                          |
| sweet bakery products                  | 21          | 0.86                                             | 98.32                                          |
| ready-to-eat cereal                    | 22          | 0.72                                             | 99.04                                          |
| desserts                               | 23          | 0.61                                             | 99.65                                          |
| sour cream                             | 24          | 0.49                                             | 100.14                                         |
| dried fruits and nuts                  | 25          | 0.36                                             | 100.50                                         |
| beer                                   | 26          | 0.27                                             | 100.77                                         |
| juices                                 | 27          | 0.23                                             | 101.00                                         |
| snacks                                 | 28          | 0.20                                             | 101.20                                         |
| other nonalcoholic beverages           | 29          | 0.20                                             | 101.40                                         |

<sup>1/</sup> food categories and groups contributed at least 0.2% of serine

**Table S19.** Food categories and groups sources of alanine contribution to the average Polish diet

| <b>Food Categories<br/>Food Groups</b>           | <b>Rank</b> | <b>% of Alanine<sup>1/</sup><br/>Contribution</b> | <b>Cumulative % of Alanine<br/>Contribution</b> |
|--------------------------------------------------|-------------|---------------------------------------------------|-------------------------------------------------|
| <b>Food Categories</b>                           |             |                                                   |                                                 |
| meat and meat products                           | 1           | 48.67                                             | 48.67                                           |
| grain products                                   | 2           | 19.16                                             | 67.83                                           |
| milk and dairy products                          | 3           | 11.90                                             | 79.73                                           |
| vegetables                                       | 4           | 7.82                                              | 87.55                                           |
| Eggs                                             | 5           | 4.28                                              | 91.82                                           |
| Seafood                                          | 6           | 3.46                                              | 95.29                                           |
| snacks and sweets                                | 7           | 1.97                                              | 97.26                                           |
| Fruits                                           | 8           | 1.45                                              | 98.71                                           |
| nonalcoholic beverages                           | 9           | 0.48                                              | 99.19                                           |
| alcoholic beverages                              | 10          | 0.41                                              | 99.60                                           |
| fats and oils                                    | 11          | 0.39                                              | 99.99                                           |
| <b>Food Groups</b>                               |             |                                                   |                                                 |
| meat products                                    | 1           | 21.23                                             | 21.23                                           |
| bread, rolls, bread products                     | 2           | 13.11                                             | 34.34                                           |
| poultry                                          | 3           | 12.89                                             | 47.23                                           |
| red meat                                         | 4           | 12.11                                             | 59.35                                           |
| vegetables (excluding potatoes)                  | 5           | 5.58                                              | 64.93                                           |
| eggs                                             | 6           | 4.28                                              | 69.20                                           |
| milk                                             | 7           | 3.84                                              | 73.04                                           |
| cheese                                           | 8           | 3.42                                              | 76.45                                           |
| yoghurts and milk drinks                         | 9           | 2.46                                              | 78.91                                           |
| other meat                                       | 10          | 2.43                                              | 81.34                                           |
| potatoes                                         | 11          | 2.24                                              | 83.58                                           |
| cottage cheese                                   | 12          | 2.19                                              | 85.77                                           |
| flour, bran, cooking ingredients                 | 13          | 2.10                                              | 87.88                                           |
| processed seafood                                | 14          | 2.10                                              | 89.97                                           |
| pizza, pasta, macaroni and other<br>flour dishes | 15          | 2.02                                              | 92.00                                           |
| fishes                                           | 16          | 1.36                                              | 93.36                                           |
| rice, cooked grains                              | 17          | 1.11                                              | 94.47                                           |
| fruits                                           | 18          | 1.09                                              | 95.56                                           |
| ready-to-eat cereal                              | 19          | 0.81                                              | 96.37                                           |
| chocolate                                        | 20          | 0.72                                              | 97.09                                           |
| sweet bakery products                            | 21          | 0.70                                              | 97.79                                           |
| beer                                             | 22          | 0.41                                              | 98.20                                           |
| desserts                                         | 23          | 0.38                                              | 98.58                                           |
| dried fruits and nuts                            | 24          | 0.36                                              | 98.93                                           |
| juices                                           | 25          | 0.30                                              | 99.23                                           |
| sour cream                                       | 26          | 0.28                                              | 99.51                                           |

<sup>1/</sup> food categories and groups contributed at least 0.2% of alanine
